# Supplementary material for: Left Ventricular Mass Reduction by a Low-Sodium Diet in Treated Hypertensive Patients
Source: PubMed Central journal article supplement (PMC7761364; doi:10.3390/nu12123714), 2020-11-30
Supplement: nutrients-12-03714-s001.pdf [file nutrients-12-03714-s001.pdf]

Supplementary Table S1. Drug classes in the two subgroups from Time 0-1 to Time 2.

| Drug Class                | Reducers (N = 76) | Non Reducers (N = 62) |
|---------------------------|-------------------|-----------------------|
| ACE/I                     | 15                | 12                    |
| ARB                       | 16                | 12                    |
| HTZ                       | 2                 | 2                     |
| CCB                       | 5                 | 3                     |
| ACE/I + HTZ               | 10                | 7                     |
| ARB + HTZ                 | 10                | 9                     |
| (ACE/I or ARB) + CCB      | 15                | 15                    |
| ( $\beta$ B or CCB) + HTZ | 3                 | 2                     |

Table S1: ACE/I (angiotensin converting enzyme inhibitors); ARB (angiotensin receptor blockers); HTZ (hydrochlorothiazide and thiazide diuretics); CCB (calcium channel blockers);  $\beta$ B (beta blockers). In the contingency analysis there were no significant differences between groups:

Chi<sup>2</sup>: All drug classes df 0.7745, 7;  $p=.9977$ .

Chi<sup>2</sup>: (ACE/I and ARB) vs others df 0.1103, 1;  $p=.7399$ .  
 (ACE/I or ARB)/CCB vs others df 0.0009, 1;  $p=.9760$ .  
 HTZ vs non-HTZ df 0.0007, 1;  $p=.9791$ .

Fischer: (ACE/I and ARB) vs others;  $p=.7995$ .  
 (ACE/I or ARB)/CCB vs others;  $p=1.000$ .  
 HTZ vs non-HTZ;  $p=1.000$ .

Supplementary Figure S1. LVH regression / LVH progression.

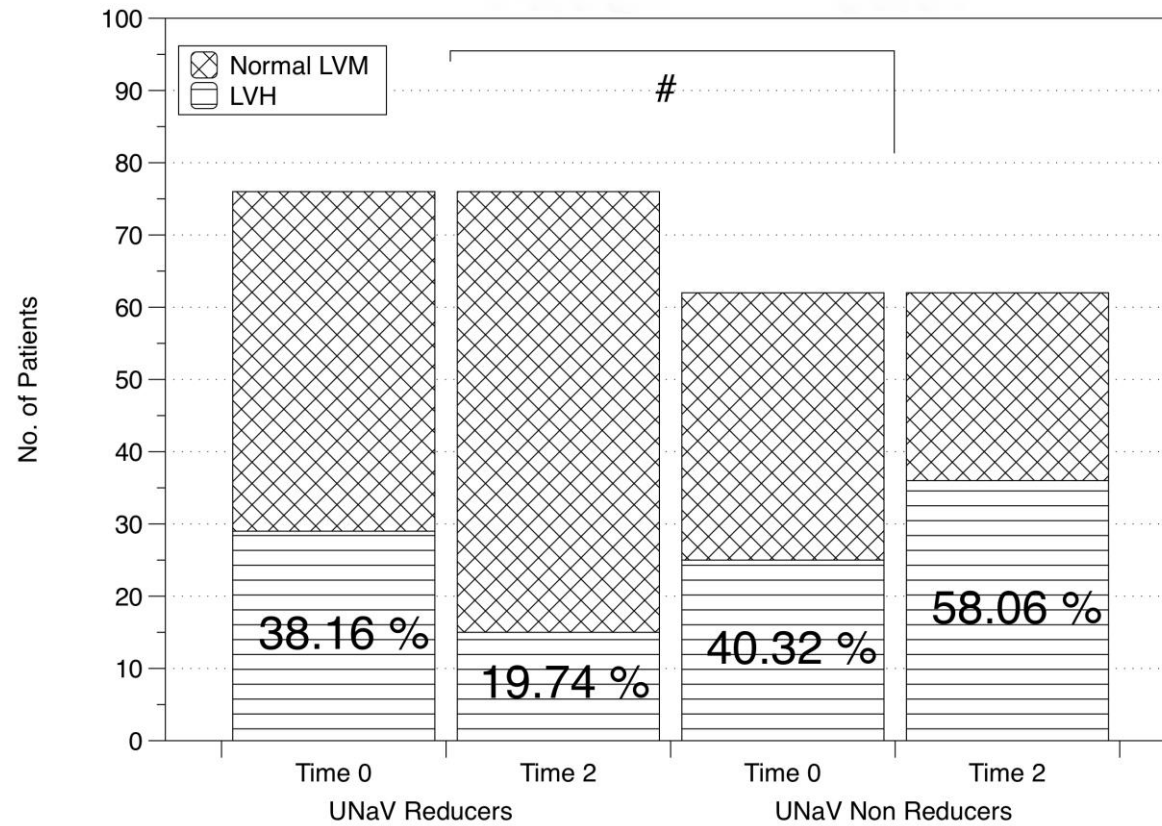

Figure S1: LVH regression in patients with sodium excretion reduction over time (UNaV Reducers), compared to LVH progression in patients without sodium reduction over time (UNaV Non Reducers). (Chi<sup>2</sup> test, #  $p=0.002$ ). Patients with LVH are expressed also as percent values (values inside bars). LVH: left ventricular hypertrophy; LVM: left ventricular mass; UNaV: 24-h urinary sodium excretion.
